# Supplementary material for: Sjuksköterskors läkemedelshantering för god patientsäkerhet
Source: Royal Society of Chemistry journal article supplement (doi:10.1039/c8ra09145e), 2010-01-01
Supplement: c8ra09145e1.pdf [file c8ra09145e1.pdf]

**Table R1.** Summary of TiO<sub>2</sub> based DSSCs with their corresponding components in recent two years

| photoanode                 | dye        | electrolyte                                 | counter electrode | Efficiency (%) | Reports      |
|----------------------------|------------|---------------------------------------------|-------------------|----------------|--------------|
| NP-MS                      | N719       | I <sup>-</sup> /I <sub>3</sub> <sup>-</sup> | Pt                | 7.32           | Current work |
| TNT                        | N719       | I <sup>-</sup> /I <sub>3</sub> <sup>-</sup> | Pt                | 3.62           | [47]         |
| 3DOM/m                     | N719       | I <sup>-</sup> /I <sub>3</sub> <sup>-</sup> | Pt                | 9.20           | [48]         |
| P25                        | N719<br>BD | I <sup>-</sup> /I <sub>3</sub> <sup>-</sup> | Pt                | 3.85           | [49]         |
| HNP/SP                     | N719       | I <sup>-</sup> /I <sub>3</sub> <sup>-</sup> | Pt                | 8.65           | [50]         |
| TCS/3DMS                   | N719       | I <sup>-</sup> /I <sub>3</sub> <sup>-</sup> | Pt                | 6.83           | [33]         |
| RGO-3DGNs-TiO <sub>2</sub> | N719       | I <sup>-</sup> /I <sub>3</sub> <sup>-</sup> | Pt                | 7.68           | [51]         |
| NP/MS                      | N719       | LOMG                                        | Pt                | 7.66           | [52]         |
| B-TNA                      | N719       | I <sup>-</sup> /I <sub>3</sub> <sup>-</sup> | Pt                | 8.02           | [53]         |

$$Z = \left( \frac{R_t R_r}{1 + i\omega / \omega_k} \right)^{\frac{1}{2}} \coth \left[ \left( \frac{\omega_k}{\omega_d} \right)^{\frac{1}{2}} \left( 1 + \frac{i\omega}{\omega_k} \right) \right]^{\frac{1}{2}} \quad \text{Eq S1}$$

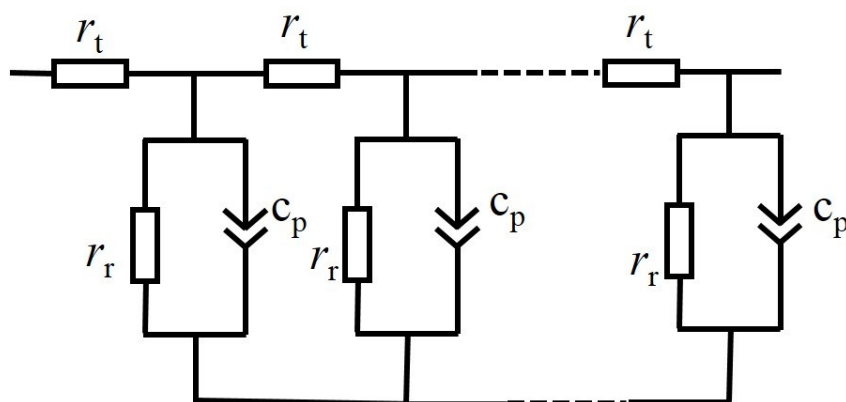

**Figure S1.** The composition of DX1.
